# Supplementary material for: Immunoregulation of bovine lactoferrin together with osteopontin promotes immune system development and maturation
Source: Royal Society of Chemistry journal article supplement (doi:10.1039/d3fo03515h), 2023-12-05
Supplement: d3fo03515h2.xlsx [file d3fo03515h2.xlsx]

## Sheet: Figure1
ELISA
	Control		LPS		LF		OPN		LOP
IL-1β(pg/ml)	11.9101	11.789	31.12	30.5889	25.1369	26.9725	10.2655	14.2119	8.41395	9.11805
PCR
	Control			LPS			LF			OPN			LOP
TLR4	1.11326	0.85554	1.04993	10.769	10.6495	11.2654	0.0526784	0.0582589	0.0671526	0.180598	0.145592	0.933321	0.459843	0.498152	0.541864
IL-1β	0.990326	0.804643	1.25493	1.5792	1.45418	1.49412	0.656221	0.642642	0.572039	1.43229	1.62661	1.60763	0.753011	0.46664	0.419409

## Sheet: Figure2
		body weight		CONTROL								LF								OPN								LOP
			7d	3.4	3	3.1	3.3	3.8	3.8	3.4	3.9	3.3	3.3	3.6	3	2.9	3.2	3	2.7	3.7	3.2	3.3	3.4	3.5	3.4	3.5	3.8	4.2	4.4	3.3	3.1	3.5	3.1	3.6	3.7
			14d	6.3	5.9	5.8	6.4	6.3	6.5	6.2	6.5	5.8	6.1	4.7	5	5.1	5	4.6	4.9	5.9	6.1	6.1	6.2	5.8	6.2	5.9	6.6	6.2	6.4	6.8	7	6.8	6.5	6.9	6.7
			21d	8	7.4	7.3	7.1	7.2	7.2	7.2	7.6	7.5	6.8	6.4	6.4	7.5	6.6	7.2	7.5	7	7.4	6.3	7.2	7.3	6.9	7.4	7.3	7.3	7.1	7.2	7.6	8.1	6.9	6.4	6.4
			Control					LF					OPN					LOP
	serum	IgG	6.59342	7.09611	7.57717	7.57177	6.63666	12.9176	12.1068	11.9176	8.7393	14.1446	9.93927	10.3339	9.33388	10.6474	10.4257	14.8743	15.4797	13.8851	11.4744	15.5013
		IgM	1172.75	1468.96	1264.81	1059.17	1427.4	1237.34	1483.81	1679.05	1900.28	2074.74	1470.44	1661.98	2007.92	2005	1881.72	2200.2	2016.83	2139.32	2187.58	1887.66
		IL-4	156.357	144.042	148.603	139.605	142.715	149.971	135.376	151.837	145.079	138.859	147.401	155.984	145.866	156.896	157.767	178.665	174.27	173.192	168.092	174.726
		IL-10	396.923	390.592	352.497	416.453	314.832	398.43	372.135	359.901	406.902	346.381	397.567	365.481	362.477	357.326	416.882	454.98	433.193	425.145	452.723	431.69

## Sheet: Figure3
				Control					LF					OPN					LOP
	Figure 3B		GM-CSF	4.83358	4.68432	4.72807	5.11152	4.54277	6.0174	5.94019	6.14093	6.20784	5.76519	7.02621	7.21151	6.75085	6.8718	7.24239	7.19349	6.82033	7.61298	7.2321	7.27842
			SCF	28.4931	28.9499	29.1698	30.1678	30.2354	46.4407	46.6775	47.9123	47.7263	47.6079	33.4833	31.3181	32.6206	31.2673	32.8236	44.1063	44.7491	46.9989	42.7869	41.0784
			IL-3	8.32285	8.80198	8.71718	8.50093	8.72566	9.18783	9.92561	9.83657	9.65	9.70936	7.92852	7.36883	7.38155	7.82676	7.52571	12.317	12.1432	11.5665	12.1474	11.7022
	Fiugre 3C		GM-CSF	6.70452	6.97217	6.42401	6.12291	5.62108	7.47143	7.89864	8.1354	7.91922	5.51041	6.81776	6.42144	8.65525	8.04018	6.7457	8.05305	7.97584	8.45966	8.58062	9.06186
			SCF	33.7708	34.7858	23.6552	23.3508	23.3	34.3121	31.8086	29.5927	31.927	34.4475	32.0623	29.8633	34.0415	32.6544	49.0626	47.0666	44.174	51.6845	36.6972	52.9194
			IL-3	5.33358	5.92295	5.56678	6.57593	6.50809	12.2577	10.0062	10.6125	6.66921	6.50809	10.7779	9.90441	9.50584	10.7439	10.3157	9.53128	11.1892	11.24	10.6422	10.3242
			Control				LF				OPN				LOP
	Figure 3D	thymosin	800.195	745.97	771.04	1828.99	1214.31	1414.11	1092.41	887.955	1279.69	1331.55	1246.92	1408.99	1666.46	1413.72	1692.25	1672.56
		IL-10	147.282	134.69	130.958	249.858	142.537	149.213	166.911	131.096	151.066	142.306	147.322	169.745	268.17	329.402	272.945	193.58

## Sheet: Figure4
			Control												LPS			LPS+LF								LPS+OPN							LPS+LOP
	Fiugre 4A	IL-4	8.091	8.508	9.986	8.508	7.151	10.246	8.211	8.284	11.085	10.213	10.05	9.585	4.434	3.849	2.919	5.981	5.223	5.142	4.944	4.97	4.515	5.535	5.21	6.744	5.933	5.196	5.101	5.182	5.55	5.115	7.701	7.701	6.819	6.633	5.933	5.565
		IL-10	15.737	18.069	15.737	17.739	18.202	19.648	20.15	18.069	16.098	17.674	14.465	18.403	7.124	8.818	9.326	10.539	11.87	10.671	10.193	11.87	12.658	11.304	12.708	13.118	13.806	12.607	14.354	11.679	12.308	12.457	16.342	14.69	15.382	16.652	13.17	13.698
	FIGURE 4B	IL-6	92.404	94.523	101.117	108.594	98.971	103.88	92.854	109.353	102.66	106.025	93.173	106.433	321.318	358.944	325.123	161.597	192.466	166.437	163.577	173.877	178.212	174.382	155.401	163.392	163.732	169.47	163.58	171.129	154.191	167.348	122.21	133.223	134.166	140.098	151.115	148.491
		IL-B	13.895	14.926	11.771	12.901	13.348	12.2	12.665	13.079	12.315	13.228	13.438	13.59	29.482	33.969	30.17	25.506	22.99	28.758	28.554	29.64	29.066	28.1	24.199	25.185	23.762	25.737	24.778	26.111	25.645	24.733	17.846	18.345	17.147	16.064	21.585	23.245
		TNF-A	51.192	37.216	36.871	42.219	49.097	42.736	42.866	41.962	47.791	46.376	49.392	44.054	381.828	331.218	231.814	85.123	85.369	88.637	83.418	90.709	84.145	80.807	75.601	76.261	80.573	78.502	74.946	79.186	80.573	79.877	54.164	50.285	54.486	53.685	68.095	68.293

## Sheet: Figure5
			Control					LPS					LPS+LF					LPS+OPN					LPS+LOP
	Figure 5A		109.6	73	94.8	63.75	109.25	59.2	59.2	26	54.6	35.5	61	33	62.75	58.25	66.5	32.8	52.6	72	32.2	37.8	56.5	86.4	63.4	61.6	93.6
			Control				LPS				LPS+LF				LPS+OPN				LPS+LOP
	Figure 5B		2.5	2.6	5	4.6	14	15.25	6.5	9.6	6	6.66667	10.5	6.4	9	9.75	6.5	8.5	3.5	5	3	5
			Control					LPS					LPS+LF					LPS+OPN					LPS+LOP
	Figure 5C		7.55644	10.3824	7.38833	8.57333	6.93968	10.3957	14.0167	13.2042	15.2057	14.7565	8.17424	8.39				7.9513	8.58	11.2571	7.99524	7.92688	9.15095	6.37175	6.84	7.08571	6.675
			Control				LPS				LPS+LF				LPS+OPN				LPS+LOP
	Figure 5D		0.84	0.528658	0.25619	0.211905	11.1611	9.5684	9.23333	9.5	1.94	3.14667	3.52	3.16667	2.71616	3.01905	3.47238	3.31667	0	1.74286	1.97318	1.38952
			Control				LPS				LPS+LF				LPS+OPN				LPS+LOP
	Figure 5E	IL-6	1.27281	0.7662	0.197899	2.63551	2.27452	4.8302	6.60691	2.74823	2.63525	1.26652	2.45998	1.97605	3.5958	2.11886	1.24567	1.7821	1.46532	2.31693	2.4764	1.89842
		IL-10	1.9891	1.25734	0.85194	0.472768	0.266291	0.326946	0.17176	0.402499	0.552712	0.362805	0.542758	0.604974	0.805813	1.3421	0.64179	0.789307	1.22099	0.431584	1.4357	0.491701
		IL-1B	0.914591	0.907304	0.814194	2.10882	5.56834	2.19345	4.52529	4.31534	1.32654	3.33373	2.26377	3.83684	4.48112	2.39565	1.30449	1.76553	1.96561	3.29944	2.29185	3.77875
	Figure 5F		Control				LPS		LPS+LF		LPS+OPN		LPS+LOP
			4.75392	11.3225	8.15963	10.6192	15.2771	11.0939	10.8221	5.88391	12.0543	11.7966	13.0743	8.81893

## Sheet: Figure6
			LF			OPN			LOP
	Figure 6B	Stomach	26.359	24.2164	20.3677	71.0163	61.7315	48.4316	53.9503	55.38	48.6832
		Intestine	38.7779	39.8096	29.0173	93.3501	97.3651	92.7227	81.6403	82.3175	81.6403

## Sheet: supplementary figure 1
			Control					LF					OPN					LOP
B		IgM	993.962	1491.59	1137.8	1093.13	946.611	1327.2	1304.87	1456.75	1278.96	1220.89	1822.15	2022.27	1788.2	2061.58	1387.06	1616.67	1345.07	1407.61	2113.4	1761.4
		IgG	5.73366	5.31109	8.46227	5.26279	10.0077	10.9977	13.7263	13.3762	9.67566	9.54889	8.59508	9.68169	7.82841	8.4502	14.3904	13.9799	14.0583	11.4565	11.7281	16.0444
			Control						LPS						LPS+LF						LPS+OPN						LPS+LOP
A		0	20.9	22.5	22.4	20.9	21	21.9	19.4	21.2	20	20.8	19.2	20.7	20.6	20	21	20.7	20.9	21	21.5	21.3	20	20.5	20.5	18.7	20.6	20	21.9	20.7	21.3	22.8
		2	21.2	22.3	23	21.2	21.3	21.7	19.4	21.9	20	21.1	20	21.6	21.3	20.7	21.3	20	21	20.9	21.6	20.7	20	21.3	20	19.5	20.8	20.65	22	20	21.5	23.3
		4	21.9	22.9	23.3	22.2	21.9	22.2	20	22.4	21.1	21.8	20.6	22.4	21.2	21.2	21.7	21.1	21.5	21.5	22.3	21.4	20.6	21.9	21.4	20	21.9	21.2	22.5	21.5	21.9	23.8
		6	22.5	22.9	23.6	23.2	22.1	22.8	20.7	22.8	21.2	22.3	21.3	23.2	22	21.8	22.1	23	22.2	22	23.5	22	21.2	23.3	21.8	20	22.3	22.2	22.9	22.3	22.9	24.2
		8	19.4	19.54	20.55	19.45	19.3	19.59	17.7496	19.5503	18.1783	19.1215	18.2641	19.8933	19.47	19.32	19.35	19.57	19.82	19.48	20.31	19.01	18.42	20.12	19.23	18.04	19.9	19.73	19.8	19.87	20.18	20.46

## Sheet: supplementary figure 2
					Control					LF					OPN					LOP
		B		GM-CSF	6.93614	7.31445	7.30158	7.15232	7.36849	5.44608	5.33027	5.25821	5.15527	5.65196	6.29019	6.13063	6.04571	6.13063	5.98909	7.38393	7.39937	6.93614	7.3479	7.62327
				SCF	34.549	35.3609	33.4833	36.0037	36.2574	42.4317	43.2605	42.8715	42.8884	40.6217	37.8813	40.4864	37.7122	39.353	38.0505	37.7798	39.15	35.4455	36.9171	37.5261
				IL-3	7.9794	7.45787	7.50027	8.58998	8.58574	7.2077	7.42819	6.86425	7.2501	7.69531	9.27687	9.74752	9.57368	8.71294	9.544	11.1595	11.168	11.6216	11.7404	11.1425
		C		GM-CSF	6.44975	6.17953	6.88724	7.03393	5.9685	8.08136	8.33099	6.50379	6.79202	7.64643	8.57032	8.18944	6.95673	6.72511	8.63981	10.1685	10.4876	9.10047	9.45819	7.21151
				SCF	36.4604	38.761	33.6017	36.4097	30.5568	32.0962	31.2673	39.2008	37.6107	42.6008	52.1413	53.9343	41.8058	44.3601	36.1559	58.3493	53.799	44.4954	46.779	49.0964
				IL-3	7.69531	7.46211	8.37373	8.7723	7.10594	7.82676	7.43667	9.97649	10.0698	7.16106	9.7136	10.5235	9.14543	9.37864	10.7779	13.9537	14.1954	11.5496	11.8591	12.423
				Control				LF				OPN				LOP
		D	thymosin	1075.54	1249.06	1216.56		850.953	1121.92	1840.55	1043.98	1572.81	1018.33	1151.91	1318.94	1070.15	984.983	1721.04	1756.95
			IL-10	196.25	158.431	161.988		163.38	125.321	227.61	164.012	163.38	125.321	227.61	164.012	174.127	160.687	206.986	236.79

## Sheet: supplementary figure 3
				Control						LF						OPN						LOP
		A	IgA	2.6684	2.4256	2.2892	1.7218	1.9331	3.484	3.2878	3.8916	2.367	2.1705	2.60851	3.04865	2.99948	2.32919	2.19549	3.1487	2.00111	2.07333	3.44799	2.71267	2.34063	2.19078	1.76111	2.85906
			IgG	33.8715	39.2069	29.7369	19.1112	20.2889	39.6441	40.7573	33.5582	21.7338	21.0916	29.2446	38.6154	42.1954	28.34	20.9558	27.6881	19.738	24.7248	33.856	27.848	40.8613	22.3616	22.7825	38.4067
			IL-10	20.132	20.666	20.0868	21.4567	17.6229	29.4731	29.2217	26.3119	16.8459	14.0247	23.2193		14.73	27.1269	15.3675	18.9201	17.3155	33.0539	35.1103	19.7594	23.1083	24.3009	29.4165
				Control						LF						OPN						LOP
		B	IgA	2.77388	2.63369	2.43085	2.3712	2.24916	2.21141	2.05407	1.87384	1.97335	1.98306	2.97764	3.08451	2.07176	2.59491	3.34416	3.21331	2.61605	2.29169	2.61648	3.10076	2.17433	2.61128	4.54416	2.00834
			IgG	24.0006	40.447	28.9072	26.9834	26.9335	26.5853	25.6454	27.4209	35.2037	22.9087	41.2728	54.9609	27.6502	30.9771	41.2884	41.8699	38.623	28.7355	44.3612	32.889	26.0491	39.0024	53.0959	32.3193
			IL-10	22.7814	23.2382	20.2888	22.3231	15.8567	17.6352	20.2661	18.4499	18.9197	22.6483	25.0169	42.6403	20.7821	31.1513	35.9434	30.3015	28.6478	25.5852	23.3485	30.2787	20.239	24.4538	37.9575	22.0359
